# Supplementary material
Source: publisher figshare collection journal article supplement (https://acs.figshare.com/ndownloader/files/5773470)
Supplement: Supplementary file 1 [file 5773470]

#       SUPER001:E2_PM3_ESP_MNDO      vs E2_PM3_ESP_MNDO
#    -128.660 Total      -53.959 Electro    -12.771 Steric     -61.929 Hydro
#	Creation time:		Sat Mar 21 11:35:52 1992

#	Modifying user name:	tom
#	Modification time:	Fri Jun 10 17:04:59 1994

@<TRIPOS>MOLECULE
E2_PM3_ESP_MNDO      vs E2_PM3_ESP_MNDO
   88    94     1     5     0
SMALL
USER_CHARGES


@<TRIPOS>ATOM
      1 C1         -3.2656    0.1298   -0.5276 C.ar      1 <1>       -0.0913
      2 C2         -4.4744   -0.5486   -0.5221 C.ar      1 <1>       -0.4446
      3 C3         -4.4624   -1.9498   -0.5212 C.ar      1 <1>        0.4666
      4 C4         -3.2550   -2.6549   -0.5255 C.ar      1 <1>       -0.4622
      5 C5         -2.0464   -1.9567   -0.5285 C.ar      1 <1>        0.2063
      6 C6         -0.7806   -2.7529   -0.5097 C.3       1 <1>       -0.1870
      7 C7          0.4533   -1.9395   -0.8618 C.3       1 <1>       -0.1100
      8 C8          0.4323   -0.6178   -0.1111 C.3       1 <1>       -0.0299
      9 C9         -0.7661    0.2245   -0.5949 C.3       1 <1>        0.0883
     10 C10        -2.0480   -0.5553   -0.5272 C.ar      1 <1>       -0.2377
     11 C11        -0.8403    1.5455    0.1806 C.3       1 <1>       -0.1054
     12 C12         0.4562    2.3453    0.0875 C.3       1 <1>       -0.4188
     13 C13         1.6414    1.4945    0.5463 C.3       1 <1>        0.3884
     14 C14         1.6840    0.2216   -0.3361 C.3       1 <1>       -0.0460
     15 C15         3.0586   -0.3733   -0.0464 C.3       1 <1>       -0.2717
     16 C16         3.9720    0.8484    0.1315 C.3       1 <1>       -0.1265
     17 C17         3.0484    2.0890    0.2393 C.3       1 <1>        0.1961
     18 C18         1.5155    1.1778    2.0376 C.3       1 <1>       -0.5449
     19 O3         -5.6038   -2.7062   -0.5173 O.3       1 <1>       -0.6223
     20 O17         3.5706    2.9697    1.2073 O.3       1 <1>       -0.6747
     21 ****       -3.2487    1.2309   -0.5290 H         1 <1>        0.1608
     22 ****       -5.4172    0.0096   -0.5205 H         1 <1>        0.2106
     23 ****       -3.2569   -3.7519   -0.5268 H         1 <1>        0.2482
     24 ****       -0.6701   -3.1890    0.5046 H         1 <1>        0.0734
     25 ****       -0.8708   -3.6149   -1.2006 H         1 <1>        0.0816
     26 ****        1.3698   -2.5085   -0.6085 H         1 <1>        0.0446
     27 ****        0.5040   -1.7590   -1.9542 H         1 <1>        0.0590
     28 ****        0.3237   -0.8212    0.9886 H         1 <1>        0.0954
     29 ****       -0.6119    0.4669   -1.6790 H         1 <1>        0.0623
     30 ****       -1.6941    2.1447   -0.2068 H         1 <1>        0.0774
     31 ****       -1.0839    1.3421    1.2433 H         1 <1>        0.0617
     32 ****        0.6170    2.6904   -0.9539 H         1 <1>        0.0892
     33 ****        0.3784    3.2645    0.7011 H         1 <1>        0.1094
     34 ****        1.6853    0.5372   -1.4126 H         1 <1>        0.0506
     35 ****        3.0384   -1.0017    0.8643 H         1 <1>        0.0958
     36 ****        3.4023   -1.0354   -0.8614 H         1 <1>        0.0864
     37 ****        4.6111    0.7389    1.0283 H         1 <1>        0.0966
     38 ****        4.6672    0.9580   -0.7200 H         1 <1>        0.0663
     39 ****        3.0220    2.6454   -0.7288 H         1 <1>        0.0080
     40 ****        2.4660    0.8203    2.4577 H         1 <1>        0.1441
     41 ****        0.7671    0.3873    2.2158 H         1 <1>        0.1328
     42 ****        1.2099    2.0612    2.6139 H         1 <1>        0.1355
     43 ****       -6.3443   -2.1126   -0.5171 H         1 <1>        0.4382
     44 ****        2.8449    3.5048    1.5019 H         1 <1>        0.3992
     45 C1         -3.2656    0.1298   -0.5276 C.ar      1 <1>       -0.0913
     46 C2         -4.4744   -0.5486   -0.5221 C.ar      1 <1>       -0.4446
     47 C3         -4.4624   -1.9498   -0.5212 C.ar      1 <1>        0.4666
     48 C4         -3.2550   -2.6549   -0.5255 C.ar      1 <1>       -0.4622
     49 C5         -2.0464   -1.9567   -0.5285 C.ar      1 <1>        0.2063
     50 C6         -0.7806   -2.7529   -0.5097 C.3       1 <1>       -0.1870
     51 C7          0.4533   -1.9395   -0.8618 C.3       1 <1>       -0.1100
     52 C8          0.4323   -0.6178   -0.1111 C.3       1 <1>       -0.0299
     53 C9         -0.7661    0.2245   -0.5949 C.3       1 <1>        0.0883
     54 C10        -2.0480   -0.5553   -0.5272 C.ar      1 <1>       -0.2377
     55 C11        -0.8403    1.5455    0.1806 C.3       1 <1>       -0.1054
     56 C12         0.4562    2.3453    0.0875 C.3       1 <1>       -0.4188
     57 C13         1.6414    1.4945    0.5463 C.3       1 <1>        0.3884
     58 C14         1.6840    0.2216   -0.3361 C.3       1 <1>       -0.0460
     59 C15         3.0586   -0.3733   -0.0464 C.3       1 <1>       -0.2717
     60 C16         3.9720    0.8484    0.1315 C.3       1 <1>       -0.1265
     61 C17         3.0484    2.0890    0.2393 C.3       1 <1>        0.1961
     62 C18         1.5155    1.1778    2.0376 C.3       1 <1>       -0.5449
     63 O3         -5.6038   -2.7062   -0.5173 O.3       1 <1>       -0.6223
     64 O17         3.5706    2.9697    1.2073 O.3       1 <1>       -0.6747
     65 ****       -3.2487    1.2309   -0.5290 H         1 <1>        0.1608
     66 ****       -5.4172    0.0096   -0.5205 H         1 <1>        0.2106
     67 ****       -3.2569   -3.7519   -0.5268 H         1 <1>        0.2482
     68 ****       -0.6701   -3.1890    0.5046 H         1 <1>        0.0734
     69 ****       -0.8708   -3.6149   -1.2006 H         1 <1>        0.0816
     70 ****        1.3698   -2.5085   -0.6085 H         1 <1>        0.0446
     71 ****        0.5040   -1.7590   -1.9542 H         1 <1>        0.0590
     72 ****        0.3237   -0.8212    0.9886 H         1 <1>        0.0954
     73 ****       -0.6119    0.4669   -1.6790 H         1 <1>        0.0623
     74 ****       -1.6941    2.1447   -0.2068 H         1 <1>        0.0774
     75 ****       -1.0839    1.3421    1.2433 H         1 <1>        0.0617
     76 ****        0.6170    2.6904   -0.9539 H         1 <1>        0.0892
     77 ****        0.3784    3.2645    0.7011 H         1 <1>        0.1094
     78 ****        1.6853    0.5372   -1.4126 H         1 <1>        0.0506
     79 ****        3.0384   -1.0017    0.8643 H         1 <1>        0.0958
     80 ****        3.4023   -1.0354   -0.8614 H         1 <1>        0.0864
     81 ****        4.6111    0.7389    1.0283 H         1 <1>        0.0966
     82 ****        4.6672    0.9580   -0.7200 H         1 <1>        0.0663
     83 ****        3.0220    2.6454   -0.7288 H         1 <1>        0.0080
     84 ****        2.4660    0.8203    2.4577 H         1 <1>        0.1441
     85 ****        0.7671    0.3873    2.2158 H         1 <1>        0.1328
     86 ****        1.2099    2.0612    2.6139 H         1 <1>        0.1355
     87 ****       -6.3443   -2.1126   -0.5171 H         1 <1>        0.4382
     88 ****        2.8449    3.5048    1.5019 H         1 <1>        0.3992
@<TRIPOS>BOND
     1    1    2 ar
     2    1   10 ar
     3    2    3 ar
     4    3    4 ar
     5    3   19 1
     6    4    5 ar
     7    5    6 1
     8    5   10 ar
     9    6    7 1
    10    7    8 1
    11    8    9 1
    12    8   14 1
    13    9   10 1
    14    9   11 1
    15   11   12 1
    16   12   13 1
    17   13   14 1
    18   13   17 1
    19   13   18 1
    20   14   15 1
    21   15   16 1
    22   16   17 1
    23   17   20 1
    24    1   21 1
    25    2   22 1
    26    4   23 1
    27    6   24 1
    28    6   25 1
    29    7   26 1
    30    7   27 1
    31    8   28 1
    32    9   29 1
    33   11   30 1
    34   11   31 1
    35   12   32 1
    36   12   33 1
    37   14   34 1
    38   15   35 1
    39   15   36 1
    40   16   37 1
    41   16   38 1
    42   17   39 1
    43   18   40 1
    44   18   41 1
    45   18   42 1
    46   19   43 1
    47   20   44 1
    48   45   46 ar
    49   45   54 ar
    50   46   47 ar
    51   47   48 ar
    52   47   63 1
    53   48   49 ar
    54   49   50 1
    55   49   54 ar
    56   50   51 1
    57   51   52 1
    58   52   53 1
    59   52   58 1
    60   53   54 1
    61   53   55 1
    62   55   56 1
    63   56   57 1
    64   57   58 1
    65   57   61 1
    66   57   62 1
    67   58   59 1
    68   59   60 1
    69   60   61 1
    70   61   64 1
    71   45   65 1
    72   46   66 1
    73   48   67 1
    74   50   68 1
    75   50   69 1
    76   51   70 1
    77   51   71 1
    78   52   72 1
    79   53   73 1
    80   55   74 1
    81   55   75 1
    82   56   76 1
    83   56   77 1
    84   58   78 1
    85   59   79 1
    86   59   80 1
    87   60   81 1
    88   60   82 1
    89   61   83 1
    90   62   84 1
    91   62   85 1
    92   62   86 1
    93   63   87 1
    94   64   88 1
@<TRIPOS>SUBSTRUCTURE
     1 ****        1 TEMP              0 ****  ****    0 ROOT
@<TRIPOS>ROTATABLE_BOND
    5     4    46  1 1     0  0
   23    22    47  2 1     0  0
   49    48    90  3 1     0  0
   67    66    91  4 1     0  0
@<TRIPOS>ANCHOR_ATOM
3
@<TRIPOS>NORMAL
@<TRIPOS>CRYSIN
12.055000 19.280001 6.632000 90.000000 90.000000 90.000000 18 1
